# Supplementary material for: Control of flowering and storage organ formation in potato by FLOWERING LOCUS T
Source: Springer Nature journal article supplement (doi:10.1038/nature10431), 2011-09-23
Supplement: 41586_2011_BFnature10431_MOESM235_ESM.pdf [file 41586_2011_BFnature10431_MOESM235_ESM.pdf]

**Supplementary Text 1. Expression of the StSP6A gene fully correlates with tuberisation induction.** Expression analyses of the StSP6A FT-homologue showed that this gene is strongly up-regulated in leaves and stolons of short day induced plants (Fig. 1f). Accumulation of this transcript is observed as early as 2-4 days after transfer to short day inductive conditions (Fig. 1f) and thus precedes tuber formation. Interruption of the long nights with a 30 min night break inhibits tuberisation and prevents StSP6A accumulation both in the leaves and stolons. Moreover, high levels of the StSP6A mRNA are detected in leaf or stolon tissues of long day grown antisense *phyB* plants, with a defect in photoperiodic tuberisation control<sup>1</sup>. This transcript is not detected in lines over-expressing the *Arabidopsis* CO protein (AtCOox) after 8 days cultivation in short days. These plants are strongly delayed in tuberisation<sup>2</sup> and need longer than 30 inductive days to tuberize.

**Supplementary Text 2. Roles of the StSP6A and StSP3D genes in short day tuberization induction and in day length-independent floral promotion.** To assess a role of StSP6A in tuberization control, we generated transgenic *Andigena* lines that over-expressed or were silenced for expression of this gene. Transgenic StSP6Aox lines tuberized under non-inductive long days (Fig 2a, b) and were induced to flower, although their flowering phenotype was less severe than that of *Hd3a* lines (Supplementary Fig. 3). A good correlation was observed between the tuberisation response of these plants and StSP6A transcript levels (Fig. 2a, b), consistent with a principal role of this gene in tuberization control. RNA profiling analyses of the stolons revealed up-regulated levels of expression of tuber-specific transcripts in long days (Supplementary Fig. 4), thus confirming induction of these plants. StSP6Aox scions grafted to wild-type stocks induced the stocks to tuberize (Fig. 3c, d), supporting movement of the StSP6A inductive signal through the graft junction, as seen for *Hd3a* plants. Transgenic StSP6A-RNAi (SP6Ai) lines, in opposite, exhibited strongly delayed tuberization in short days (Fig. 2c, d). RNA profiling studies of the RNAi stolons showed that tuber-specific genes are not yet up-regulated after 6 inductive days (Supplementary Fig. 4). While non-transgenic plants tuberize after 6-8 days under short days, SP6Ai plants required on average more than 3 weeks prior to tuberize. However, when cultivated under high irradiance conditions, they flowered at the same time as the untransformed controls, evidencing that StSP6A repression does not affect floral transition. By RT-PCR studies we confirmed that expression of the StSP3D and StSP5G genes was not affected in these plants (Supplementary Fig. 5a, b), silencing therefore being specific to the StSP6A gene.

To test whether *StSP3D* is essential for floral induction, we down-regulated expression of this gene by using an RNAi construct. Silenced lines showed a late flowering response, with 20% of the less severely repressed lines succeeding to flower (line 32, Fig. 2e, f). Flowering was suppressed in the strongest silenced lines. Scanning micrographs confirmed that the silenced plants were in a vegetative stage or had just started floral transition (Fig. 2g, h), whereas fully open flowers were observed in the controls. These plants, however, tuberized in short days at the same time as the untransformed controls and produced an equivalent number of tubers (Supplementary Fig. 7), which demonstrates that expression of this gene is not required for normal tuber development. RT-PCR studies confirmed that *StSP6A* gene expression is not affected in these plants (Supplementary Fig. 5c), *StSP3D* playing a major role in flowering but not in day length tuberization control.

### **Supplementary Text 3. Possible *StSP6A*-antagonistic function of the *StSP5G***

**and *StSP5G*-like *FT*-paralogs.** Expression analyses of the two additional *FT*-like members, *StSP5G* and *StSP5G*-like (*PGSC0003DMG400016180*) showed that transcripts for these genes are elevated in leaves of long day grown plants (Figure 1e). The *StSP5G* transcript, in addition, accumulates to high levels in the stolons of short day induced plants, although expression in these organs is delayed with respect to the *StSP6A* gene. These expression profiles are suggestive of a negative role of these *FT*-like paralogs in day length control of tuberization. In line with such function, recent studies in sugar beet showed that in this long day vernalization-requiring species, flowering time is controlled by the interplay of an antagonistic pair of mutually exclusive *FT*-homologs that respectively promote or suppress flowering<sup>3</sup>. *BvFT2* is essential for flowering, while *BvFT1* prevents bolting in non-vernalized plants. This gene is down-regulated in long days, in annual and vernalized-biennial plants, decreased levels of expression being required for *BvFT2* expression and floral transition. Interestingly, *BvFT1* carries three amino acid substitutions in an external loop formed by the fourth exon of the protein and both *StSP5G* and *StSP5G*-like homologs differ from the *StSP6A* and *StSP3D* proteins in this region (Supplementary Fig. 9).

### **Supplementary Text 4. Potato *StCO* represses *StSP6A* gene expression in**

**long days.** In potato, *CO* is encoded by three tandem duplicated genes but only one of these gene copies is expressed to relatively high levels. This transcript oscillates with a diurnal rhythm of expression that peaks at dawn<sup>4</sup>. Several lines of evidence suggest that potato *StCO* represses *StSP6A* gene expression in long days and that

transfer to short day conditions relieves this repression. In line with this activity, leaves of StCO-RNAi (COi) lines were found to express high levels of the StSP6A transcript in long days, and to tuberize in these non-inductive conditions (Supplementary Fig. 11d-f). StSP6A gene expression, by contrary, is repressed in StCO over-expressing (COox) plants, although expression is fully restored after 6 days of transfer to short day conditions (Supplementary Fig. 11a-c), hence pointing to a day length dependent switch in StCO repressor activity as reported for the rice Hd1 protein<sup>5,6</sup>.

**Supplementary Text 5. Local induction of the StSP6A protein in stolons activates tuber-specific gene expression.** To assay if StSP6A promotes tuberisation transition when locally expressed in stolons, we generated transgenic lines in which expression of this protein is driven by the AlcA/AlcR ethanol inducible system. StSP6A expression was locally activated by submerging the belowground part of the plant in a 0.5% ethanol solution and gene expression analyzed after 4 hours of induction. As seen in Figure 4d, a strong up-regulation of the tuber-specific StGA2ox1 transcript<sup>7</sup> is observed in the stolons of these plants but not in transgenic controls expressing a fragment of the GUS gene under control of the same AlcA/AlcR inducible system (Alc-uid). Likewise, many other genes reported to be induced during early stages of tuber-development<sup>8</sup> are found to be up-regulated in Alc-StSP6A stolons, although to lower levels than the StGA2ox1 gene (Figure 4e). Relative StGA2ox1 transcript levels in ethanol induced stolons actually were similar to those observed in swelling stolons, after 6 days of transfer to short day conditions (Supplementary Fig. 13), consistent with a function of this GA catabolic enzyme as a direct target of the StSP6A protein. Rapid induction (4 hours) of this transcript, on the other hand, excludes transport of the protein from the leaves or the transport of any further downstream mobile signal, which demonstrates that StSP6A is active in stolon cells and likely corresponds to a mobile protein.

**Supplementary Text 6. Model for StSP6A and StSP3D regulation of tuberisation and floral transition.** StSP6A is repressed by StCO in long days, the light receptor phyB being somehow involved in the modulation of this repressor activity. Transfer to short days induces a switch in StCO repressor function and activates StSP6A gene expression in the leaves. During transport this signal is amplified by an auto-relay mechanism partially mediated by StCO. StSP6A activation in leaves and stolons promotes tuber formation. Although StCO weakly induces StSP3D gene expression in short days, this gene mainly responds to cues such as high light irradiance. The StSP3D protein promotes flowering in the shoot apex.

**Supplementary Information References**

- 1 Jackson, S. D., Heyer, A., Dietze, J. & Prat, S. Phytochrome B mediates the photoperiodic control of tuber formation in potato. *Plant J.* **9**, 159–166 (1996).
- 2 Martinez-Garcia, J. F., Virgos-Soler, A. & Prat, S. Control of photoperiod-regulated tuberization in potato by the *Arabidopsis* flowering-time gene CONSTANS. *Proc. Natl Acad. Sci. USA* **99**, 15211–15216 (2002).
- 3 Pin, P. A. *et al.* An antagonistic pair of *FT* homologs mediates the control of flowering time in sugar beet. *Science* **330**, 1397–1400 (2010).
- 4 Rodríguez-Falcón, M., Bou, J. & Prat, S. Seasonal control of tuberization in potato: conserved elements with the flowering response. *Annu. Rev. Plant Biol.* **57**, 151–180 (2006).
- 5 Kojima, S. *et al.* Hd3a, a rice ortholog of the *Arabidopsis* FT gene, promotes transition to flowering downstream of Hd1 under short-day conditions. *Plant Cell Physiol.* **43**, 1096–1105 (2002).
- 6 Hayama, R., Yokoi, S., Tamaki, S., Yano, M. & Shimamoto, K. Adaptation of photoperiodic control pathways produces short-day flowering in rice. *Nature* **422**, 719–722 (2003).
- 7 Kloosterman, B. *et al.* *StGA2ox1* is induced prior to stolon swelling and controls GA levels during potato tuber development. *Plant J.* **52**, 362–373 (2007).
- 8 Kloosterman, B. *et al.* Genes driving potato tuber initiation and growth: identification based on transcriptional changes using the POCl array. *Functional & Integrative Genomics* **8**, 329–340 (2008).
- 9 Chincinska, IA *et al.* Sucrose transporter StSUT4 from potato affects flowering, tuberization, and shade avoidance response. *Plant Physiol.* **146**, 515–28 (2008).

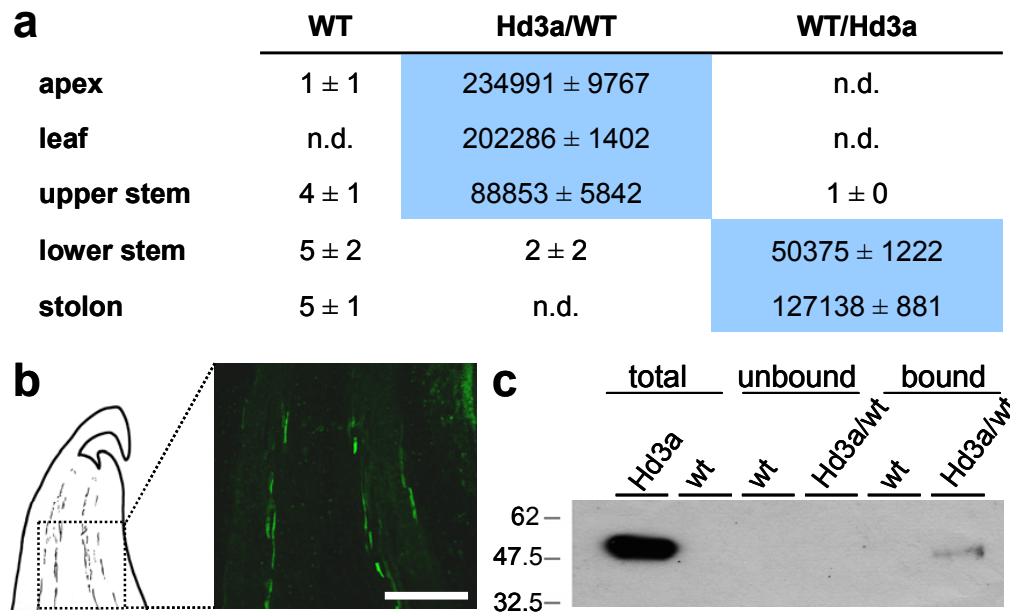

**Supplementary Figure 1. RNA and protein analyses of *Andigena rol/C::Hd3a-GFP* lines.** **a**, RT-qPCR amplification of the *Hd3a* transcript in grafted plants. Highlighted in blue are the transgenic *Hd3a* tissues. Data are means  $\pm$  standard deviation ( $n=3$ ). **b**, Confocal microscopy of transgenic *Hd3a* stolons. *Hd3a-GFP* fluorescence is detected in phloem companion cells. Scale bar: 250  $\mu$ m. **c**, Western blot detection of the *Hd3a-GFP* protein in the stolon tips of grafted wild-type stocks (*Hd3a/wt*). Protein extracts of transgenic stolons (*Hd3a*) were loaded for comparison and wild-type stolons (wt) were used as negative controls. Extracts were concentrated by affinity binding to an anti-GFP agarose matrix (bound). The unbound fraction (unbound) was loaded to test for binding efficiency.

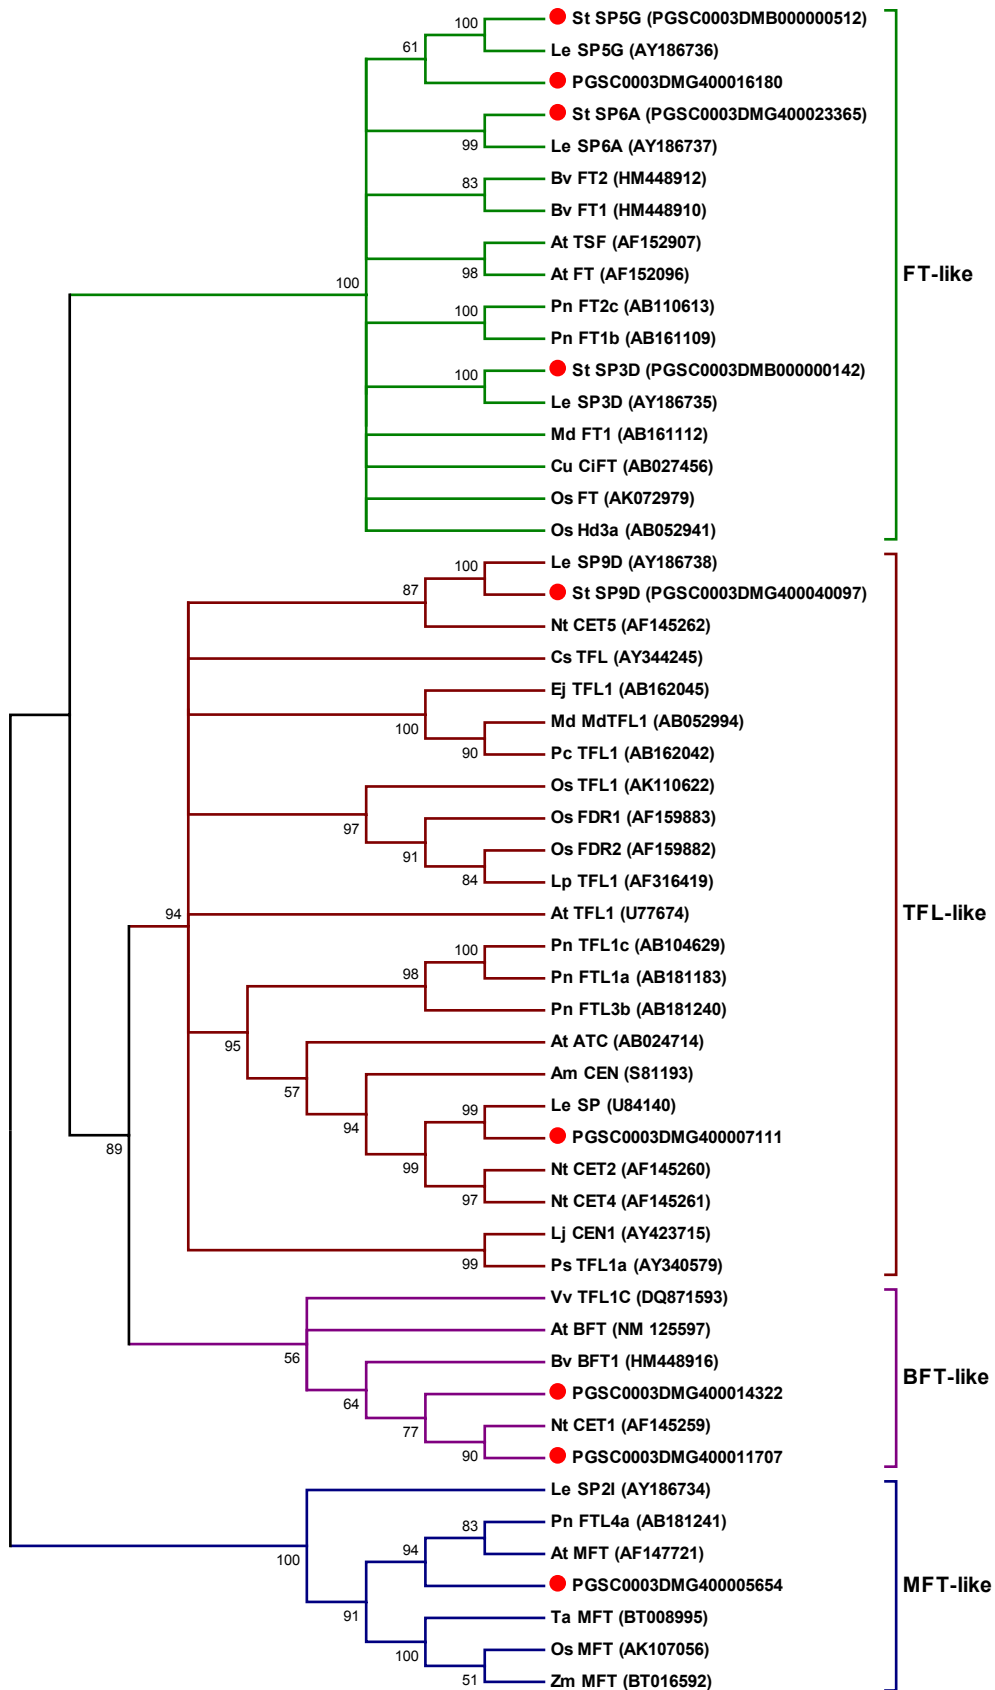

**Supplementary Figure 2. The potato FT/TFL1-like gene family.** Neighbor-Joining phylogenetic tree of FT/TFL1-like genes from different species. FT, TFL1, BFT and MFT clades are highlighted in green, brown, purple and blue, respectively. Genes from potato are marked with a red dot. Am: *Antirrhinum majus*, At: *Arabidopsis thaliana*, Bv: *Beta vulgaris*, Cs: *Citrus sinensis*, Cu: *Citrus unshiu*, Ej: *Eriobotrya japonica*, Le: *Solanum lycopersicum*, Lj: *Lotus japonicus*, Lp: *Lolium perenne*, Pn: *Populus nigra*, Md: *Malus x domestica*, Nt: *Nicotiana tabacum*, Os: *Oryza sativa*, Pc: *Pyrus communis*, Ps: *Pisum sativum*, St: *Solanum tuberosum*, Ta: *Triticum aestivum*, Vv: *Vitis vinifera*, Zm, *Zea mays*.

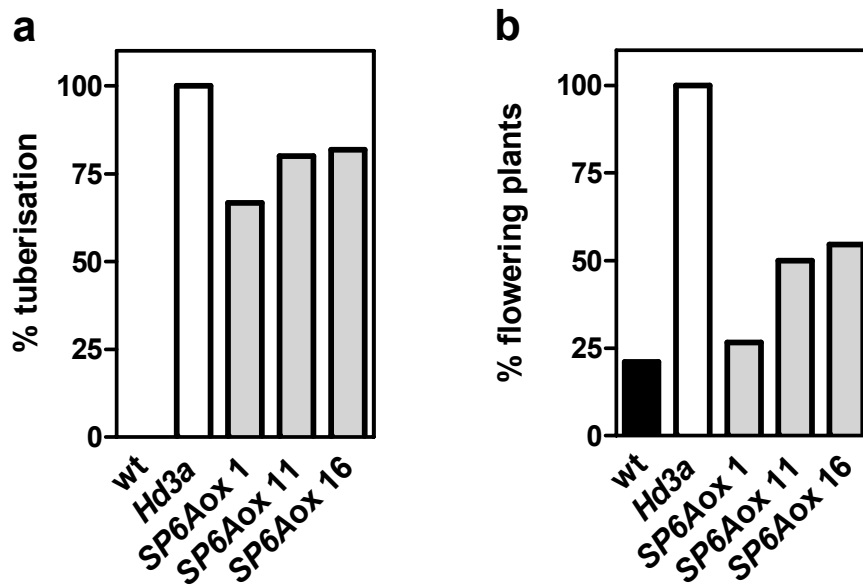

**Supplementary Figure 3. Long day tuberization and flowering phenotypes of *Hd3a* and *StSP6A* over-expressing plants (*SP6Aox*).** **a**, Tuberization of *Hd3a* and *StSP6A* over-expressing plants (*SP6Aox*) in long days scored when 100% of the *Hd3a* plants had initiated tuberization. **b**, Percentage of flowering plants, scored when all the *Hd3a* plants were flowering. n=27 in wt and n=15 in *Hd3a* and *StSP6Aox* lines.

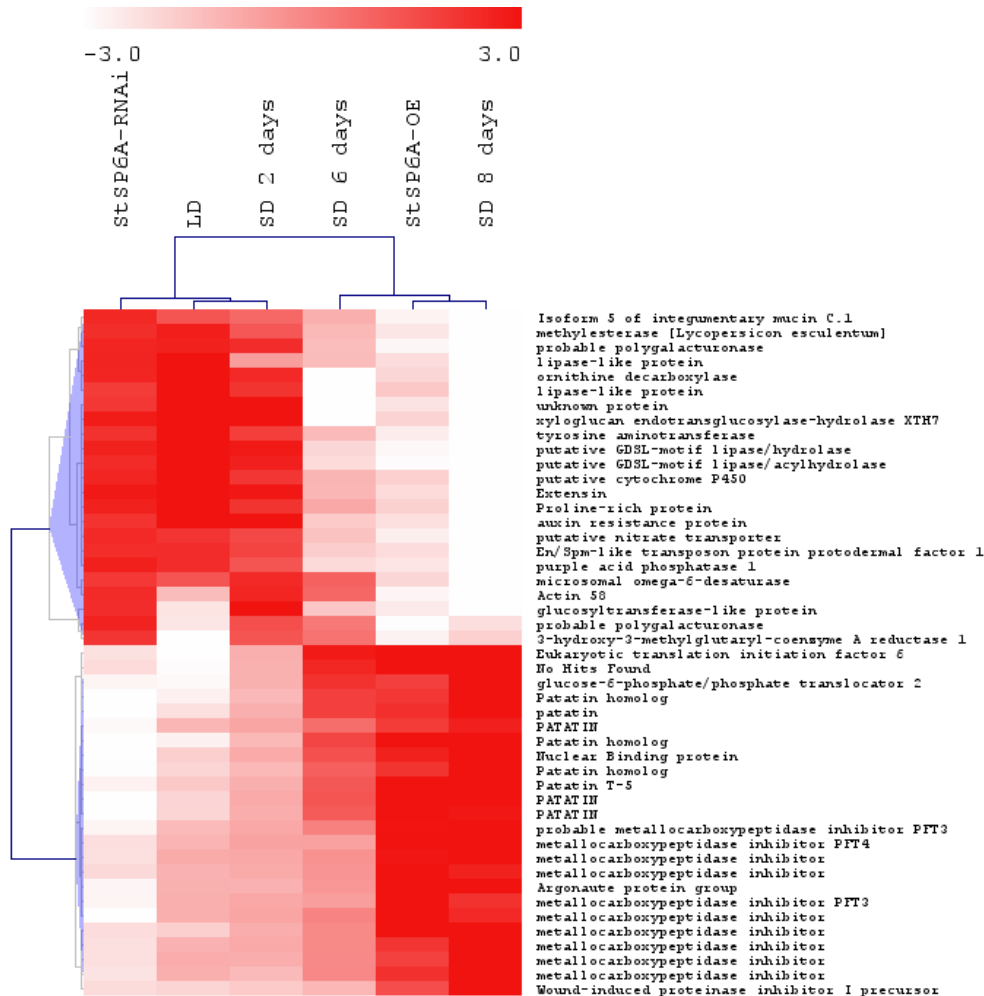

**Supplementary Figure 4. Hierarchical clustering of genes differentially expressed in stolons of *StSP6A* over-expression and RNAi plants.** Heat map representation of relative expression profiles of *StSP6A*ox and *StSP6A*-RNAi stolons, analyzed under non inductive long days (LD) and inductive short days (SD 6 days), respectively. Gene expression in non-induced wild-type stolons and time course regulation of these genes after 2 days, 6 days and 8 days of transfer to short days is also shown for comparison. Note that the expression profiles of short days *StSP6A*-RNAi stolons group with non-induced/2 days induced wild-type stolons, while those of long day *StSP6A*ox stolons group with 6 days and 8 days induced wild-type stolons. Gene description and numeric values are provided in Supplementary Table 1.



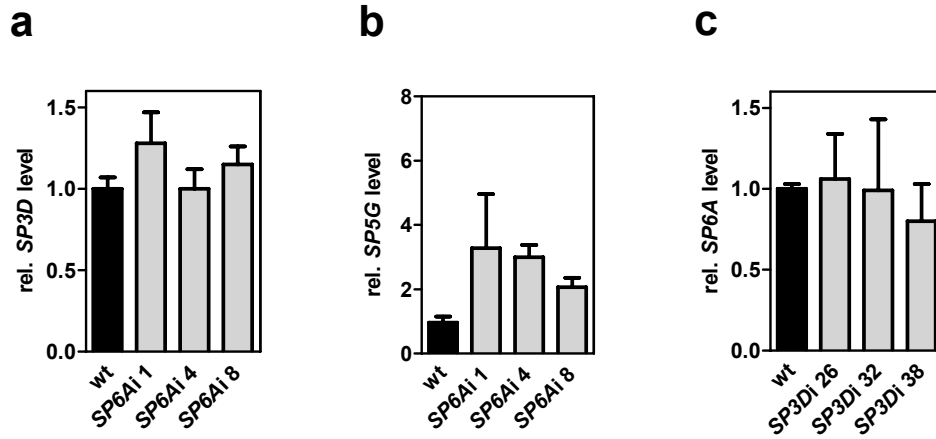

**Supplementary Figure 5. Expression of the *StSP3D* and *StSP5G* transcripts in *StSP6A*-RNAi (*SP6Ai*) lines (a-b) and *StSP6A* transcript levels in *StSP3D*-RNAi (*SP3Di*) lines (c).** Transcript levels were quantified by RT-qPCR analyses of the transgenic leaves sampled after 6 days of transfer to short day inductive conditions. Error bars indicate standard deviation (n=3).

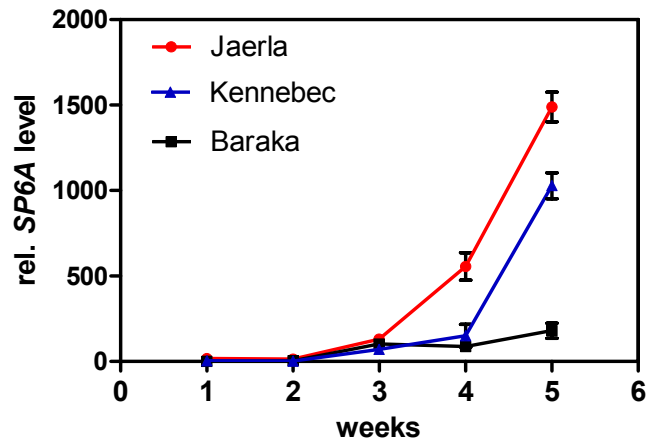

**Supplementary Figure 6. StSP6A expression in commercial varieties.** Time course of StSP6A relative expression in three commercial potato varieties: *Jaerla* (early-maturing), *Kennebec* (intermediate) and *Baraka* (late-maturing). Error bars represent standard deviation (n=3).

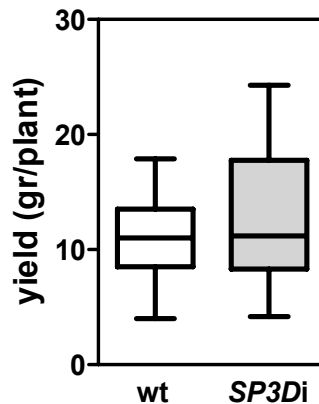

**Supplementary Figure 7. Tuber yield per plant in StSP3D-RNAi lines.** Box-whisker plots of tuber yield (gr/plant) distributions of wild-type and StSP3D-RNAi (*SP3Di*) plants under short day conditions (n=30, wt and n=24, *SP3Di*). A t-test analysis (two tailed p-value 0.1484) showed no significant difference between these populations.

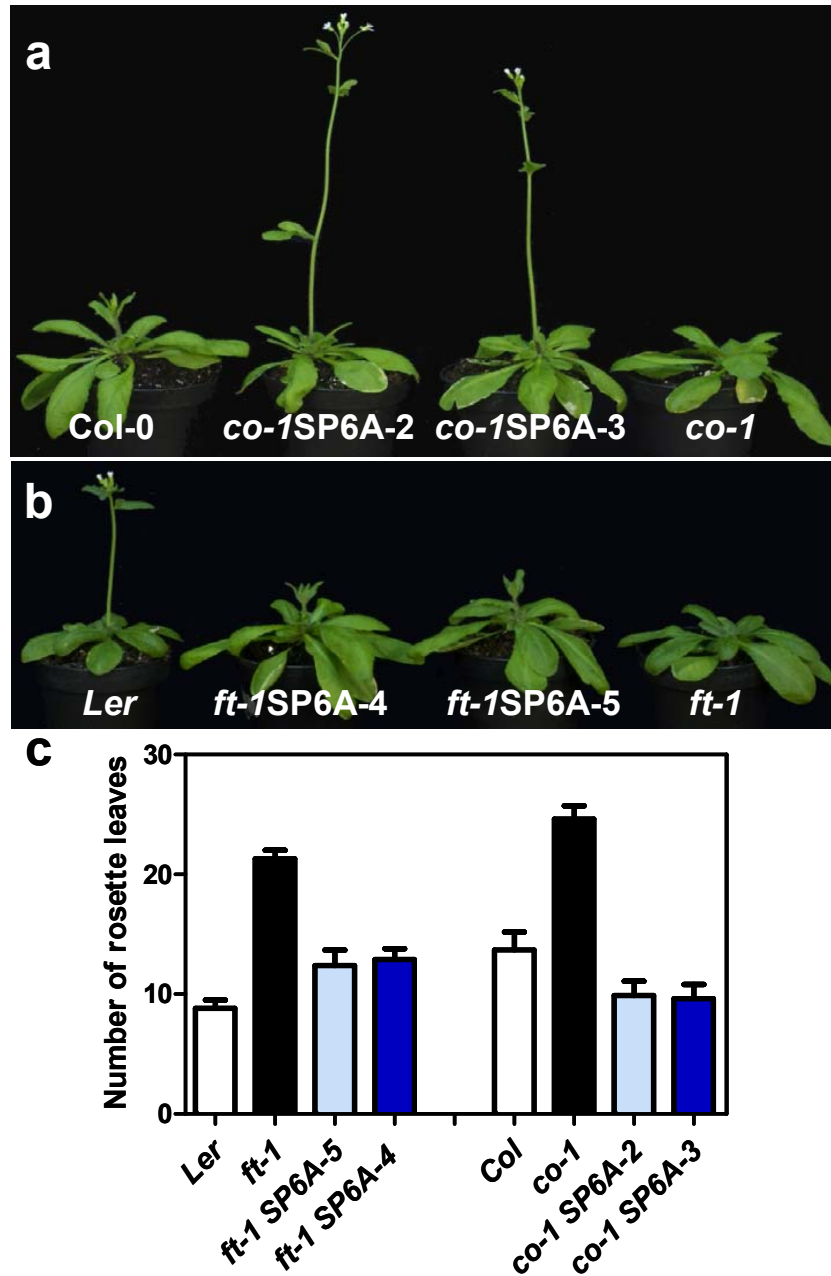

**Supplementary Figure 8. Complementation of the late flowering phenotype of the *co-1* and *ft-1* *Arabidopsis* mutants by the *StSP6A* gene. a, b, Lines harboring the potato *StSP6A* transgene bolted earlier than the corresponding *co-1* (a) and *ft-1* (b) mutants. c, Flowering time of the transgenic lines estimated as the number of rosette leaves at flowering. Error bars indicate standard deviation (n=10).**

|                  |      |          |      |     |    |        |        |
|------------------|------|----------|------|-----|----|--------|--------|
|                  |      |          |      | *   |    | **     |        |
| Arabidopsis FT   | ..Y. | QLGROT   | VYAP | --- | GW | -      | RQNFNT |
| Rice Hd3a        | ..Y. | QLGROT   | VYAP | --- | GW | -      | RQNFNT |
| Potato SP6A      | ..Y. | QSRRE    | VYAP | --- | GW | -      | RQNFNT |
| Potato SP3D      | ..Y. | QLGROT   | VYAP | --- | GW | -      | RQNFNT |
| Sugar Beet BvFT2 | ..Y. | QLGROT   | VYAP | --- | GW | -      | RQNFNT |
| Potato SP5G      | ..Y. | QLGREAIN | APDI | IDS | -  | RQNFNT |        |
| Potato SP5G like | ..Y. | QLRREI   | VHAP | --- | EN | -      | RQNFDT |
| Sugar beet BvFT1 | ..Y. | QLGROT   | VNAP | --- | QQ | -      | RQNFNT |

**Supplementary Figure 9. StSP6A, StSP5G and PGSC0003DMG200016180 (SP5G-like) amino acid sequence alignment with other FT-like proteins.** Partial alignment showing amino acid exchanges in the segment region B of the fourth exon. Black stars in the upper part and red letters in the sugar beet BvFT1 sequence indicate the amino acid residues found to be implicated in flowering repression in sugar beet<sup>3</sup>.

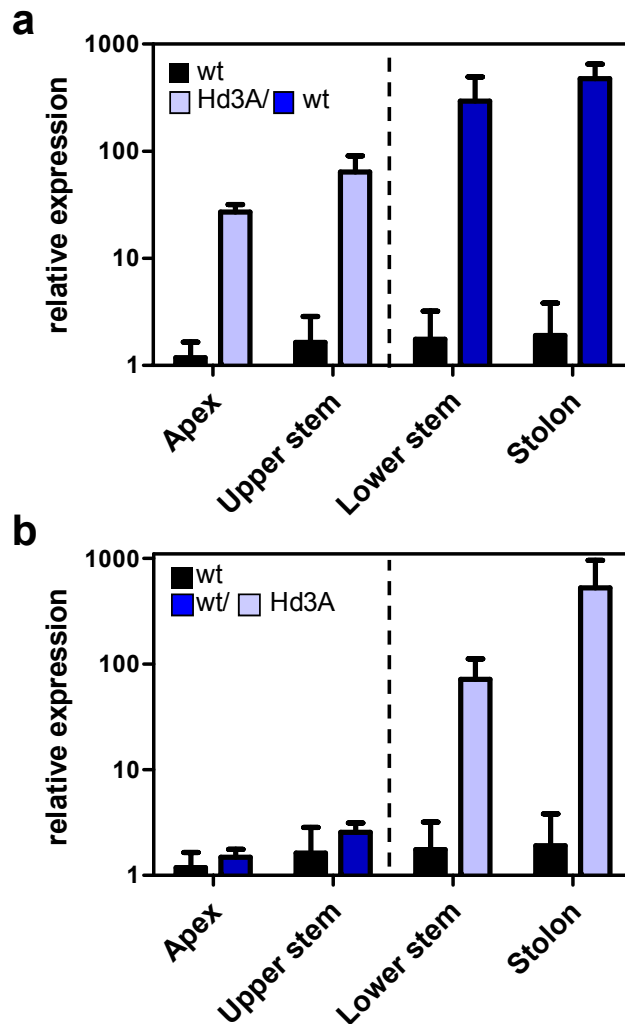

**Supplementary Figure 10. *StSP6A* expression in *Hd3A* grafted plants.** RT-qPCR was used to analyze relative *StSP6A* expression in different organs of grafted plants grown under long days. **a**, *Hd3a* scions grafted onto wild-type stocks. **b**, Wild-type scions grafted onto *Hd3a* stocks. *StSP6A* transcript levels in wild-type (dark blue bars) and *Hd3a* tissues (light blue bars) were estimated as the  $2^{-\Delta\Delta C_T}$  value relative to the mean values obtained in wild-type control tissues. Values are represented in a logarithmic scale. The dashed line indicates the graft junction. Error bars indicate standard deviation of three independent experiments.

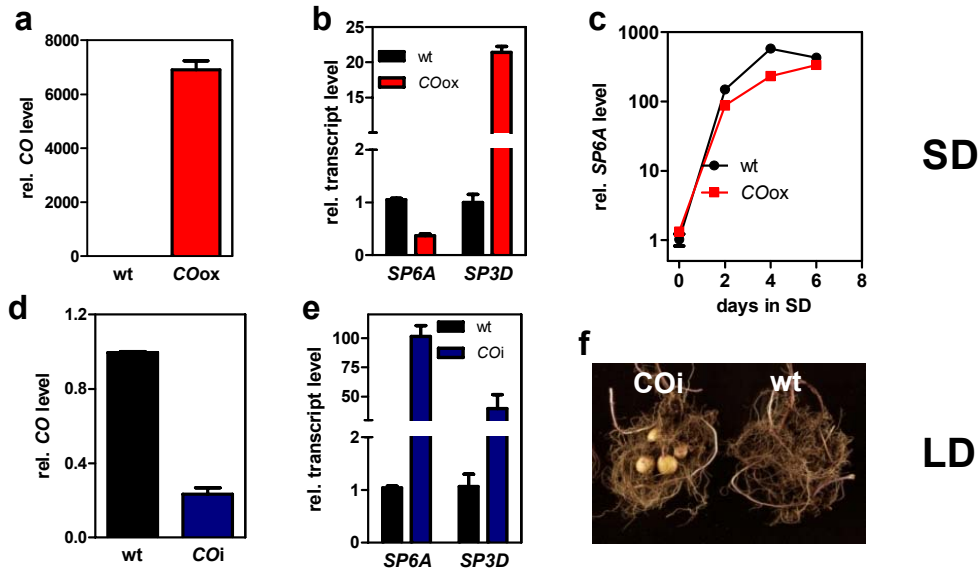

**Supplementary Figure 11. StCO acts as a repressor of tuberization under long days.** **a**, StCO transcript levels in leaves of StCO over-expressing lines (COox). **b**, Relative StSP6A and StSP3D expression in leaves of wild-type and transgenic StCOox, after 4 inductive days. **c**, Short days (SD) kinetics of StSP6A regulation in StCOox leaves. Values are represented in a logarithmic scale. **d**, StCO transcript reduction in leaves of RNAi plants (COi). **e**, StSP6A and StSP3D regulation in leaves of StCO-RNAi plants under long days (LD). Error bars indicate standard deviation of three biological replicates. **f**, Tuberization of StCO-RNAi plants (left) under non-inductive long days. Wild-type controls (right) do not tuberize.

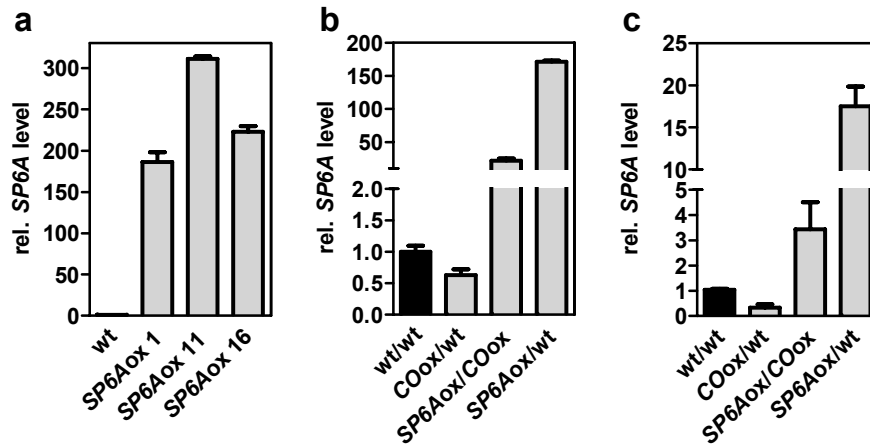

**Supplementary Figure 12. StCO repression of the relay mechanism is conserved in two different StSP6Aox lines.** StSP6A expression in leaves of different StSP6Aox lines (a). Relative StSP6A expression in grafting experiments with two different StSP6Aox lines, line 11 (b) and line 16 (c). Error bars indicate standard deviation (n=3).

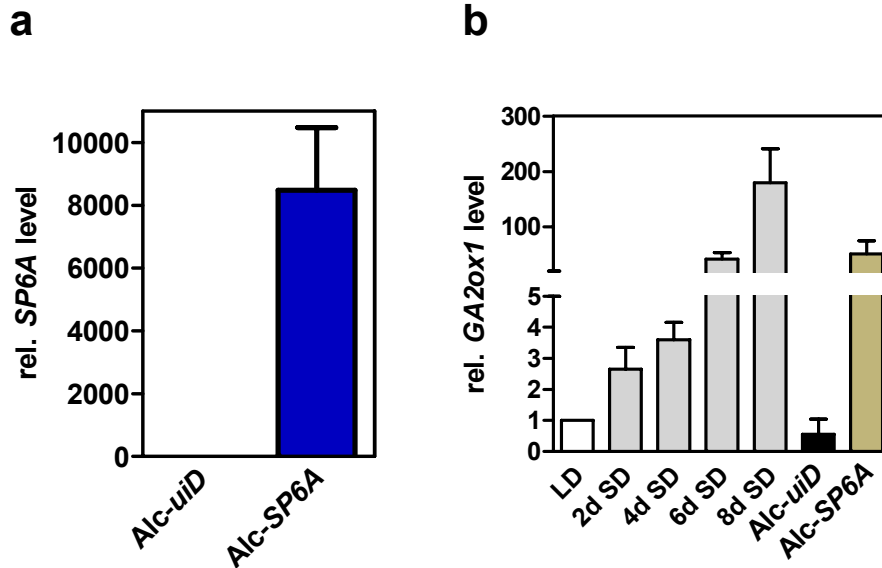

**Supplementary Figure 13. StGA2ox1 response to local StSP6A induction. a,** StSP6A expression in Alc-SP6A stolons relative to Alc-uid controls, after four hours of ethanol induction. **b,** StGA2ox1 expression in wild-type Andigena stolons after transfer to short day inductive conditions, compared to StGA2ox1 in long days (LD) grown Alc-SP6A lines after four hours of StSP6A induction with ethanol. Error bars indicate standard deviation of two independently treated samples. This experiment was repeated in different transgenic lines with similar results.



**Supplementary Table 1.** Description and numeric values of the set of genes represented in Supplementary Figure 4. Gene expression is represented as the relative log ratio.

| Photoperiod | SD      | LD       | LD    | SD 2 days | SD 6 days | SD 8 days | Accessions  | GeneName                    | Description                                                                                                                                                |
|-------------|---------|----------|-------|-----------|-----------|-----------|-------------|-----------------------------|------------------------------------------------------------------------------------------------------------------------------------------------------------|
| Genotype    | StSP6AI | StSP6Aox | WT    | WT        | WT        | WT        |             |                             |                                                                                                                                                            |
|             | -2.68   | 3.82     | -1.62 | -1.00     | 1.25      | 3.44      | NA 00000    | ACDA01685E05.T3m.scf        | Patatin T-5                                                                                                                                                |
|             | -2.19   | 3.06     | -1.11 | -0.66     | -0.61     | 3.07      | NA 00000    | bf_arrayxxx_0049e03.17m.scf | probable metalloproteinase inhibitor PFT4 - potato dbj_BAA21500.1_metalloproteinase inhibitor [Solanum tuberosum]                                          |
|             | -2.75   | 2.99     | -1.26 | -0.79     | 0.22      | 3.21      | NA 00000    | bf_arrayxxx_0053a08.17m.scf | probable metalloproteinase inhibitor PFT3 - potato dbj_BAA21495.1_metalloproteinase inhibitor [Solanum tuberosum]                                          |
|             | -2.11   | 1.52     | -1.94 | -1.68     | -1.18     | 4.30      | gb P08454   | bf_cswwxxx_0007b05.13m.scf  | Wound-induced proteinase inhibitor 1 precursor (Chymotrypsin inhibitor 1 D subunit) gb_AAA69781.1, proteinase inhibitor I                                  |
|             | 2.48    | -2.59    | 2.16  | 1.68      | -1.46     | -8.93     | gb BAD86972 | bf_mxfxxx_0014b09.13m.scf   | putative nitrate transporter [Oryza sativa (japonica cultivar-group)] dbj_BAB56042.1_putative nitrate transporter [Oryza sativa (japonica cultivar-group)] |
|             | -2.75   | 1.87     | -2.87 | -1.03     | 2.23      | 3.24      | gb AAO19451 | MICRO.1076.C1               | glucose-6-phosphate/phosphate translocator 2 [Solanum tuberosum]                                                                                           |
|             | 2.57    | -1.81    | 3.00  | 2.11      | -1.14     | -7.98     | gb AAM61354 | MICRO.13031.C1              | putative cytochrome P450 [Arabidopsis thaliana] gb_AAD30263.1                                                                                              |
|             | 2.21    | -2.21    | 3.72  | 3.84      | -1.66     | -11.46    | gb CAH59413 | MICRO.13184.C1              | auxin resistance protein [Plantago major]                                                                                                                  |
|             | 2.68    | -2.35    | 2.38  | 1.36      | -2.07     | -7.35     | gb AAT37529 | MICRO.15077.C1              | purple acid phosphatase 1 [Solanum tuberosum]                                                                                                              |
|             | -3.43   | 2.30     | -2.22 | -0.97     | 1.88      | 4.47      | gb AAZ75960 | MICRO.1520.C14              | patatin [Solanum tuberosum] pir_S51596 patatin precursor non-sucrose-inducible - Solanum brevifolium gb_AAA66198.1_patatin precursor                       |
|             | -2.88   | 2.01     | -1.16 | -0.74     | 0.69      | 2.71      | gb AAZ75962 | MICRO.1520.C23              | patatin [Solanum tuberosum] pir_A26017 patatin T5 precursor                                                                                                |
|             | -3.66   | 4.15     | -1.95 | -0.85     | 1.35      | 3.15      | pir A29810  | MICRO.1520.C3               | patatin [Solanum tuberosum] sp_P07745_PATO_SOLTU PATATIN PRECURSOR (POTATO TUBER PROTEIN)                                                                  |
|             | -4.24   | 4.42     | -1.93 | -0.93     | 1.17      | 2.91      | gb AAZ75958 | MICRO.1520.C9               | patatin [Solanum tuberosum] pir_S51596 patatin precursor non-sucrose-inducible - Solanum brevifolium gb_AAA66198.1_patatin precursor                       |
|             | 2.49    | -2.72    | 1.34  | 0.84      | -0.98     | -3.80     | NA 00000    | MICRO.15952.C1              | isoform 5 of integumentary mucin C.1                                                                                                                       |
|             | 2.87    | -2.09    | 3.98  | 2.91      | -1.16     | -12.00    | gb BAC43682 | MICRO.15956.C1              | At1g26948 [Arabidopsis thaliana] ref_NP_849712.1_expressed Polien protein. Allergen and extensin family                                                    |
|             | 2.67    | -1.84    | 3.65  | 2.18      | -0.80     | -10.36    | gb AAD24597 | MICRO.17678.C1              | ref_NP_179254.2_proline-rich family protein [Arabidopsis thaliana]                                                                                         |
|             | 2.09    | -2.30    | 8.72  | 10.31     | -5.83     | -20.66    | gb AAV59327 | MICRO.18299.C1              | unknown protein [Oryza sativa (japonica cultivar-group)] ref_XP_476200.1_unknown protein [Oryza sativa (japonica cultivar-group)]                          |
|             | -2.75   | 3.38     | -1.00 | -0.80     | -0.53     | 2.24      | gb BAA21495 | MICRO.2033.C1               | probable metalloproteinase inhibitor PFT3 - potato dbj_BAA21495.1_metalloproteinase inhibitor [Solanum tuberosum]                                          |
|             | -2.21   | 2.13     | -1.05 | -0.83     | -0.01     | 3.04      | NA 00000    | MICRO.2033.C11              | metalloproteinase inhibitor                                                                                                                                |
|             | -3.07   | 3.69     | -1.00 | -0.73     | 0.13      | 2.46      | gb BAA21493 | MICRO.2033.C2               | metalloproteinase inhibitor [Solanum tuberosum]                                                                                                            |
|             | 2.31    | 2.29     | -0.96 | -1.26     | 0.03      | 4.02      | gb AAZ94194 | MICRO.2033.C6               | metalloproteinase inhibitor [Solanum tuberosum]                                                                                                            |
|             | -2.35   | -2.14    | 2.38  | 1.76      | -1.77     | -8.56     | gb AAD21725 | MICRO.2406.C1               | [Arabidopsis thaliana] gb_AAD33868.1_protodermal factor 1 [Arabidopsis thaliana]                                                                           |
|             | -2.10   | 3.60     | -2.91 | -1.03     | 2.51      | 3.86      | NA 00000    | MICRO.3274.C2               | No Hits Found                                                                                                                                              |
|             | -2.27   | 4.23     | -3.22 | -0.98     | 2.84      | 4.30      | NA 00000    | MICRO.3274.C4               | Eukaryotic translation initiation factor 6 (EIF-6)-like protein; n=1; Arabidopsis thaliana                                                                 |
|             | 2.66    | -2.82    | 4.88  | 2.87      | -1.97     | -10.71    | gb AAM65485 | MICRO.4133.C1               | putative GDSL-motif lipase/hydrolase [Arabidopsis thaliana]                                                                                                |
|             | 2.58    | -2.14    | 3.37  | -0.54     | -1.30     | -3.76     | gb CAB78857 | MICRO.4160.C1               | lipase-like protein [Arabidopsis thaliana] emb_CAA16735.1                                                                                                  |
|             | 2.01    | -1.60    | 5.74  | 2.20      | -3.19     | -6.18     | gb CAB78857 | MICRO.4160.C6               | lipase-like protein [Arabidopsis thaliana] emb_CAA16735.1_lipase-like protein                                                                              |
|             | 2.39    | -2.92    | 5.05  | 2.71      | -2.10     | -10.42    | gb AAM64916 | MICRO.4199.C1               | putative GDSL-motif lipase/hydrolase [Arabidopsis thaliana] gb_AAC05014.1                                                                                  |
|             | 2.83    | -1.90    | 4.89  | 5.14      | -3.28     | -9.85     | gb AAS46243 | MICRO.4590.C1               | xyloglucan endotransglucosylase/hydrolase XTH7 [Lycopersicon esculentum]                                                                                   |
|             | 2.56    | -1.98    | 5.33  | 2.46      | -3.20     | -5.43     | gb AAB82301 | MICRO.561.C1                | ornithine decarboxylase [Lycopersicon esculentum] gb_AAB82301.2_ornithine decarboxylase [Lycopersicon esculentum]                                          |
|             | 2.32    | -2.37    | 2.73  | 1.26      | -1.19     | -5.34     | gb AAV87156 | MICRO.6179.C1               | methyltransferase [Lycopersicon esculentum]                                                                                                                |
|             | 2.15    | -2.71    | -3.36 | 1.37      | 0.56      | -1.81     | pir S59944  | MICRO.6420.C1               | 3-hydroxy-3-methylglutaryl-coenzyme A reductase 1 (HMG-CoA reductase 1) (HMG1)                                                                             |
|             | 2.37    | -2.48    | -2.34 | 3.16      | -1.57     | -4.00     | gb AAM13292 | MICRO.6450.C1               | glucosyltransferase-like protein [Arabidopsis thaliana] gb_AAM13292.1                                                                                      |
|             | 2.39    | -2.78    | -1.32 | 2.56      | 0.87      | -12.15    | gb CAA39278 | MICRO.6793.C1               | actin [Solanum tuberosum] pir_S20094 actin 58 - potato sp_P30167_ACT3_SOLTU Actin 58                                                                       |
|             | 2.06    | -1.98    | 1.36  | 2.46      | 1.02      | -12.57    | gb CAH48076 | MICRO.8531.C1               | microsomal omega-6-desaturase [Nicotiana tabacum]                                                                                                          |
|             | 2.57    | -2.81    | 2.65  | 2.38      | -1.33     | -5.86     | gb AAB39556 | MICRO.8715.C1               | probable polygalacturonase (EC 3.2.1.15) 1 - tomato gb_AAB39556.1_AROGP2                                                                                   |
|             | 2.63    | -2.97    | -2.38 | 1.49      | 0.41      | -2.18     | gb AAB39557 | POABU26TP                   | POABU26TP_501-probable polygalacturonase (EC 3.2.1.15) 1 - tomato gb_AAB39557.1_AROGP3                                                                     |
|             | 2.02    | -2.55    | 4.89  | 1.92      | -1.26     | -10.59    | gb CAD30341 | SDBN002A15u.scf             | SDBN002A15u.scf_448-tyrosine aminotransferase [Solenostemon scutellarioides]                                                                               |
|             | -2.15   | 3.29     | -1.78 | -0.91     | -0.01     | 4.16      | NA 00000    | TBSK00763FH07.13m.scf       | metalloproteinase inhibitor                                                                                                                                |
|             | -2.22   | 1.84     | -0.89 | -0.92     | -0.02     | 3.11      | NA 00000    | TBSK01466FC02.13m.scf       | metalloproteinase inhibitor [Solanum tuberosum]                                                                                                            |
|             | -3.38   | 2.67     | -1.79 | -0.85     | 1.47      | 3.63      | NA 00000    | TBSK02196FG12.13m.scf       | Nuclear Binding protein DMG3200020488                                                                                                                      |
|             | -2.05   | 3.06     | -1.07 | -0.86     | -0.30     | 2.67      | gb AAZ94194 | TBSK03109FD01.13m.scf       | metalloproteinase inhibitor [Solanum tuberosum]                                                                                                            |
|             | -2.22   | 2.95     | -0.87 | -0.81     | -0.23     | 3.07      | NA 00000    | TBSK03444FG12.13m.scf       | metalloproteinase inhibitor [Solanum tuberosum]                                                                                                            |
|             | -3.49   | 2.10     | -2.63 | -1.22     | 1.86      | 4.45      | NA 00000    | TBSK03752FA08.13m.scf       | Patatin homolog                                                                                                                                            |
|             | -2.77   | 3.60     | -1.03 | -1.07     | -0.36     | 3.04      | NA 00000    | TBSK04121FH05.13m.scf       | Argonaute protein group                                                                                                                                    |
|             | -2.96   | 2.18     | -1.94 | -1.19     | 1.08      | 3.20      | NA 00000    | TBSK04176FD12.13m.scf       | Patatin homolog                                                                                                                                            |
|             | -3.88   | 3.61     | -2.63 | -1.21     | 1.75      | 3.98      | NA 00000    | TBSK04996FA04.13m.scf       | Patatin homolog                                                                                                                                            |

**Supplementary Table 2.** FT/TFL1 family members identified in the Potato Genome (<http://potatogenomics.plantbiology.msu.edu/>).

| Locus                | Protein      | Transcript   | Chr. | Start poss. | End poss. | Superscaffold        | Scaffold             | comments     |
|----------------------|--------------|--------------|------|-------------|-----------|----------------------|----------------------|--------------|
| PGSC0003DMG400016180 | DMP200028269 | DMT400041726 | 11   | 4756770     | 5999682   | PGSC0003DMB000000152 | PGSC0003DMS000002042 | SP5G like    |
| PGSC0003DMG400014322 | DMP200025227 | DMT400037143 | 3    | 22117937    | 22761173  | PGSC0003DMB000000154 | PGSC0003DMS000001644 | CEN 1        |
| PGSC0003DMG400007111 | DMP200012606 | DMT400018307 | 6    | 61340731    | 61409304  | PGSC0003DMB000000091 | PGSC0003DMS000002691 | SELF-PRUNING |
| PGSC0003DMG400023365 | DMP200040404 | DMT400060057 | 5    | 53183226    | 53934257  | PGSC0003DMB000000072 | PGSC0003DMS000000201 | SP6A         |
| PGSC0003DMG400011707 | DMP200020755 | DMT400030575 | 1    | 37852084    | 37877323  | PGSC0003DMB000000560 | PGSC0003DMS000002631 | CEN 1        |
| PGSC0003DMG400015751 | DMP200027622 | DMT400040735 | 5    | 66063       | 69181     | PGSC0003DMB000000512 | PGSC0003DMS000002164 | SP5G         |
| PGSC0003DMG400040097 | DMP200062201 | DMT400090526 | 9    | 7462255     | 7564753   | PGSC0003DMB000000021 | PGSC0003DMS000000876 | SP9D         |
| PGSC0003DMG400005654 | DMP200009953 | DMT400014409 | 3    | 51272594    | 52284276  | PGSC0003DMB000000026 | PGSC0003DMS000001550 | MOTHER of FT |
| No ID                | No ID        | No ID        | 3    | 1063000     | 1068600   | PGSC0003DMB000000142 | PGSC0003DMS000000135 | SP3D         |

**Supplementary Table 3.** Primer sets used in this study. *StGA2 oxidase 1* and *StSUT1* primers have been described elsewhere<sup>7,9</sup>.

| PRIMER NAME                          | SEQUENCE (5' to 3')         | TARGET GENE                 | AMPLICON LENGTH | USAGE                 |
|--------------------------------------|-----------------------------|-----------------------------|-----------------|-----------------------|
| Hd3a:GFP for                         | GGAAAAGCTTGCCTATGTGG and    | <i>Hd3a</i>                 | 72 bp           | qPCR                  |
| Hd3a:GFP rev                         | CTGCTCCTGGCAGTTTCAA         | <i>Hd3a</i>                 | 72 bp           | qPCR                  |
| actin for                            | GGAAAAGCTTGCCTATGTGG        | <i>Stactin8</i>             | 59 bp           | qPCR                  |
| actin rev                            | CTGCTCCTGGCAGTTTCAA         | <i>Stactin8</i>             | 59 bp           | qPCR                  |
| SP6A for                             | GACGATCTTCGCAACTTTTACA      | <i>StSP6A</i>               | 74 bp           | qPCR                  |
| SP6A rev                             | CCTCAAGTTAGGGTCGCTTG        | <i>StSP6A</i>               | 74 bp           | qPCR                  |
| SP3D for                             | GGACCCAGATGCTCCAAGTC        | <i>StSP3D</i>               | 96 bp           | qPCR                  |
| SP3D rev                             | CTTGCCAAAACCTTGAACCTG       | <i>StSP3D</i>               | 96bp            | qPCR                  |
| q5G_Afor                             | GGTGTGTAGACTTTGGTGTGGTTT    | <i>StSP5G</i>               | 64 bp           | qPCR                  |
| q5G_Arev                             | GGCCTCAAGGCACATCCAT         | <i>StSP5G</i>               | 64 bp           | qPCR                  |
| CO_q_For                             | GTAGCAACAATTGGGCAAGGG       | <i>StCO</i>                 | 64 bp           | qPCR                  |
| CO_q_Rev                             | AGTAAACGGTACATGTTGCGGA      | <i>StCO</i>                 | 64 bp           | qPCR                  |
| PGSC0003DMT200041726 for             | CCAACCTCCGAGCAATCCTTA       | <i>PGSC0003DMG400016180</i> | 63 bp           | qPCR                  |
| PGSC0003DMT200041726 rev             | TGCTGGGATATCAGTGACCA        | <i>PGSC0003DMG400016180</i> | 63 bp           | qPCR                  |
| PGSC0003DMP200020755 for             | TGCCTCTTGTCATTGCTTCTAA      | <i>PGSC0003DMG400011707</i> | 110 bp          | qPCR                  |
| PGSC0003DMP200020755 rev             | AGGATCACTAGGACCTGGAACA      | <i>PGSC0003DMG400011707</i> | 110 bp          | qPCR                  |
| PGSC0003DMP200025226 for             | ACCATCAACAAGGGATCAATTC      | <i>PGSC0003DMG400014322</i> | 100 bp          | qPCR                  |
| PGSC0003DMP200025226 rev             | AGTTTCTCTCTGGGCATTGAAA      | <i>PGSC0003DMG400014322</i> | 100 bp          | qPCR                  |
| PGSC0003DMP200012606 for             | TCCAGATGTTCTGTGCTCCTAGT     | <i>PGSC0003DMG400007111</i> | 86 bp           | qPCR                  |
| PGSC0003DMP200012606 rev             | AGCAATCTGTAGTGCCTGGAAT      | <i>PGSC0003DMG400007111</i> | 86 bp           | qPCR                  |
| PGSC0003DMP200062201 for             | AGGATCTGTATGACCAGTGTG       | <i>PGSC0003DMG400040097</i> | 89 bp           | qPCR                  |
| PGSC0003DMP200062201 rev             | TTTTCCCTTCTGCTGTTTCTTC      | <i>PGSC0003DMG400040097</i> | 89 bp           | qPCR                  |
| qMFT_for                             | GGAAATTTTGCAGCCACCAGTAG     | <i>PGSC0003DMG400005654</i> | 125 bp          | qPCR                  |
| qMFT_rev                             | TTTCGATTTGCTGGTTCTTGT       | <i>PGSC0003DMG400005654</i> | 125 bp          | qPCR                  |
| SP3D_RNAi for                        | CACCGTTCAGACAATTAGGTCGACA   | <i>StSP3D</i>               | 310 bp          | RNAi construct        |
| SP3D_RNAi rev                        | AAGTAGTAGAGATTGGTGGTT       | <i>StSP3D</i>               | 310 bp          | RNAi construct        |
| SP6A_RNAi for                        | CACCTAGAATAAAGTCTATATTGAC   | <i>StSP6A</i>               | 257 bp          | RNAi construct        |
| SP6A_RNAi rev                        | ATCATATGCTAACCAATATACTC     | <i>StSP6A</i>               | 257 bp          | RNAi construct        |
| Co_RNAi for                          | CACCGTTAGCGGTGGTTCTATGAT    | <i>StCO</i>                 | 1052 bp         | RNAi construct        |
| Co_RNAi rev                          | AGAACTCTTTTTACATATAACA      | <i>StCO</i>                 | 1052 bp         | RNAi construct        |
| Col1_for                             | CACCATGTTGAAAAAGAGAAGTG     | <i>StCO</i>                 | 1239 bp         | OE construct          |
| Col1_rev                             | GAATGAAGGGACAATCCATAAC      | <i>StCO</i>                 | 1239 bp         | OE construct          |
| SP6A-ATG                             | ATCATGCCTAGAGTTGATCCATTG    | <i>StSP6A</i>               | 522 bp          | OE construct          |
| SP6A-TAA                             | TTTTTATGCGCGCAGCTCCTCCAGTAC | <i>StSP6A</i>               | 522 bp          | OE construct          |
| SP6A-SQ for                          | CCATTGATAGTTGGTCGTGTG       | <i>StSP6A</i>               | 458 bp          | semi-quantitative PCR |
| SP6A-SQ rev                          | ACAGCTGCAACAGGCAATCC        | <i>StSP6A</i>               | 458 bp          | semi-quantitative PCR |
| ActinF-SQ                            | CCTTGATGCTAGTGGTCG          | <i>Stactin8</i>             | 251 bp          | semi-quantitative PCR |
| ActinR-SQ                            | GCTCATAGTCAAGAGCCAC         | <i>Stactin8</i>             | 251 bp          | semi-quantitative PCR |
| <i>StGA2ox1</i> forward <sup>7</sup> | AGGCACAGAGTGATCGCAGAT       | <i>StGA2 oxidase 1</i>      | 65 bp           | qPCR                  |
| <i>StGA2ox1</i> reverse <sup>7</sup> | TGGTGGCCCTCCAAAGTAAA        | <i>StGA2 oxidase 1</i>      | 65 bp           | qPCR                  |
| AGL8_q_for                           | AGCAAAACAACCAGCTTTCCAA      | <i>StAGL8</i>               | 73 bp           | qPCR                  |
| AGL8_q_rev                           | TGATCCCACTGATTTTCTGTG       | <i>StAGL8</i>               | 73 bp           | qPCR                  |
| PIN1For                              | CGTGTTCGGTGGAATGAT          | <i>StPIN1</i> like protein  | 56 bp           | qPCR                  |
| PIN1Rev                              | CTCCATCGGATCGACCTGAT        | <i>StPIN1</i> like protein  | 56 bp           | qPCR                  |
| PIN4For                              | GTTTCATTGCGCGCGATTTC        | <i>StPIN4</i> like protein  | 60 bp           | qPCR                  |
| PIN4Rev                              | CCCATAGCGAAAGAACAACCA       | <i>StPIN4</i> like protein  | 60 bp           | qPCR                  |
| AuxTF_For                            | CAGCCTAAGCGGCATCTTCT        | <i>StARF8</i>               | 59 bp           | qPCR                  |
| AuxTF_Rev                            | AGCCTTTTGGCGCTAACAAA        | <i>StARF8</i>               | 59 bp           | qPCR                  |
| LC-SUT1_for <sup>9</sup>             | TTCCATAGCTGCTGGTGTTC        | <i>StSUT1</i>               | 127 bp          | qPCR                  |
| LC-SUT1_rev <sup>9</sup>             | TACCAGAAATGGGTCCACAA        | <i>StSUT1</i>               | 127 bp          | qPCR                  |
| FD forward                           | GGAGACGGAAGTGGCACATT        | <i>StFD</i>                 | 55 bp           | qPCR                  |

|               |                           |                |        |                   |
|---------------|---------------------------|----------------|--------|-------------------|
| FD reverse    | TAACTGCAGCTAAGCGTAACTGTTG | St <i>FD</i>   | 55 bp  | qPCR              |
| FPF_q_rev     | CTAGTTGAGAACGCCGGTGACT    | St <i>FPF1</i> | 127 bp | qPCR              |
| FPF_q_for     | CCCATCCAAGAGAGTACAAAATTCC | St <i>FPF1</i> | 127 bp | qPCR              |
| CDC2_q_for    | ATGTCGCCAGTGTAGGGAATGT    | St <i>CDC2</i> | 142 bp | qPCR              |
| CDC2_q_rev    | TTTCCCTTCTTGATGCTCTCA     | St <i>CDC2</i> | 142 bp | qPCR              |
| SP6A-Topo-For | CACCATGCCTAGAGTTGATCCATTG | St <i>SP6A</i> | 522 bp | AlcA-SP6A Cloning |
| SP6A-Topo-Rev | GTA CTGGAGGACGTCGCGCATAA  | St <i>SP6A</i> | 522 bp | AlcA-SP6A Cloning |
